# Supplementary material for: Halloysite nanotubes (HNTs)@ZIF-67 composites—a new type of heterogeneous catalyst for the Knoevenagel condensation reaction
Source: Royal Society of Chemistry journal article supplement (doi:10.1039/d0dt03345f), 2020-01-01
Supplement: d0dt03345f1.pdf [file d0dt03345f1.pdf]

# Supporting information

## **Halloysite Nanotubes (HNTs)@ZIF-67 Composites – a New Type of Heterogeneous Catalyst for Knoevenagel Condensation Reaction**

Buwei Hou,<sup>a</sup> Jie Wu<sup>b\*</sup>

<sup>a</sup>Department of Chemistry, College of Arts and Sciences, Case Western Reserve University, 10900 Euclid Ave., Cleveland, Ohio 44106, United States. E-mail: bxh353@case.edu

<sup>b</sup>Green Catalysis Center and College of Chemistry, Zhengzhou University, 450001, P. R. China. E-mail: wujie@zzu.edu.cn

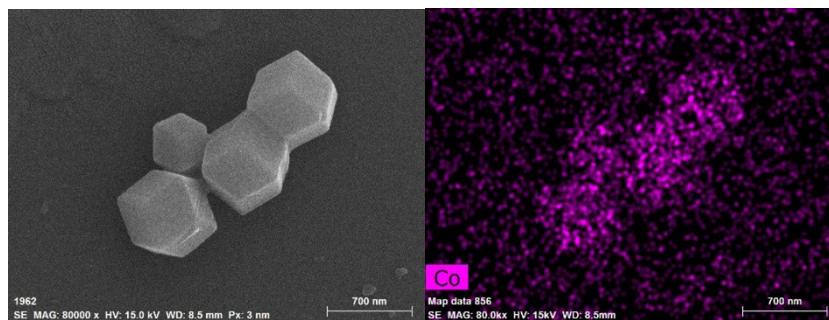

Figure S1. SEM micrograph of the as-synthesized ZIF-67.

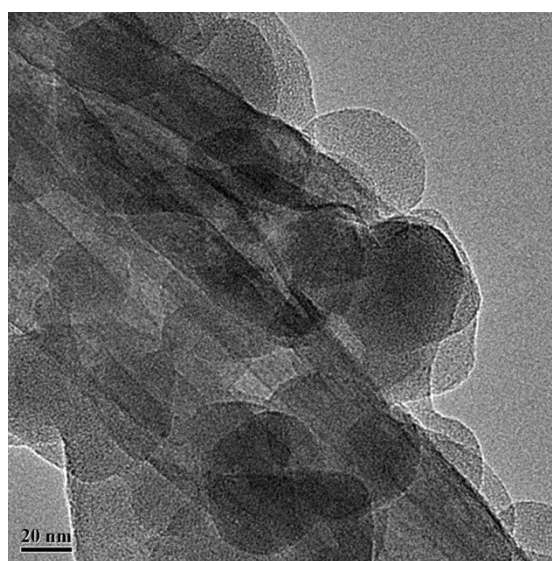

Figure S2. TEM micrograph of the as-synthesized HNTs/ZIF-67.

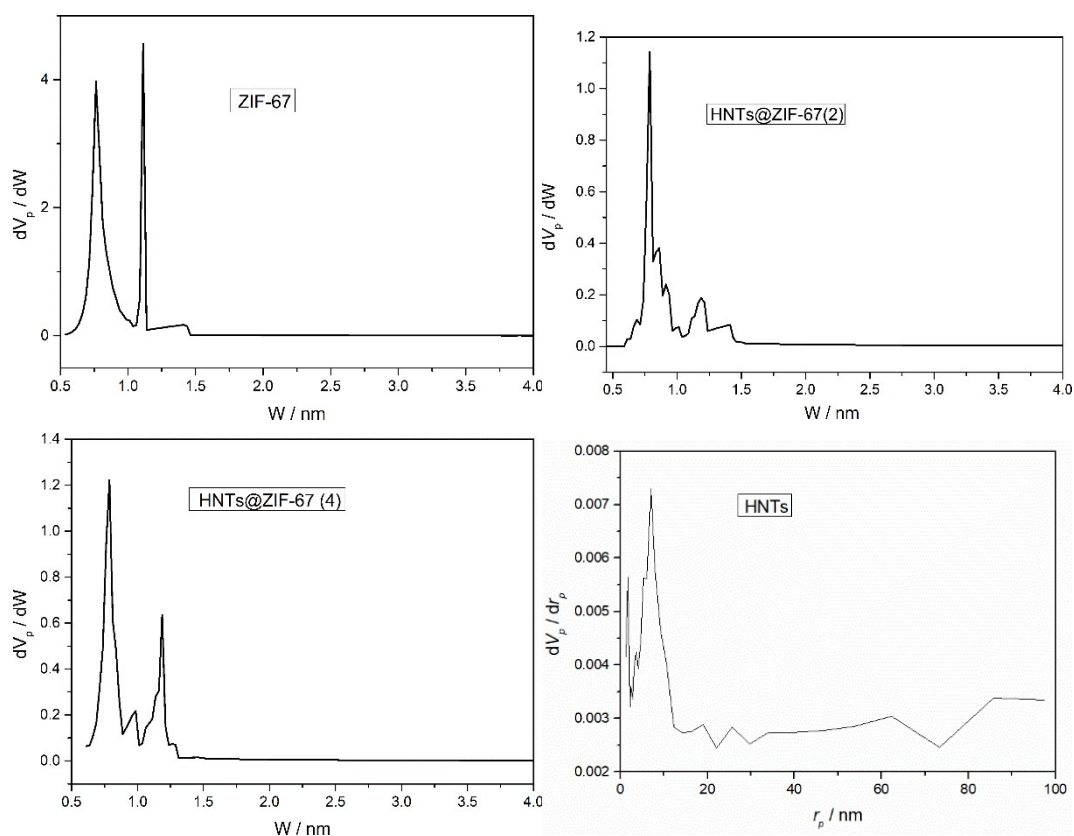

Figure S3. Pore size distribution according to the Horvath-Kawazoe or DH method for the as-synthesized ZIF-67, HNTs@ZIF-67(2), HNTs@ZIF-67(4) and HNTs.

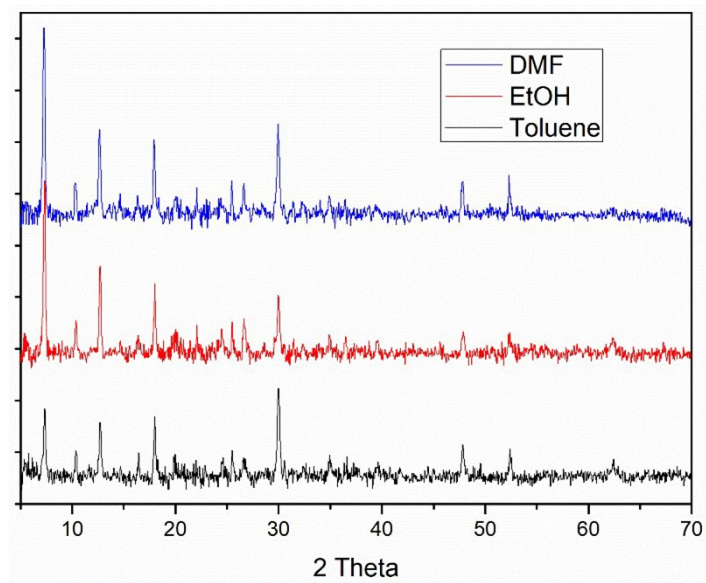

Figure S4. The PXRD patterns of the as-synthesized HNTs@ZIF-67 in the organic solvents.

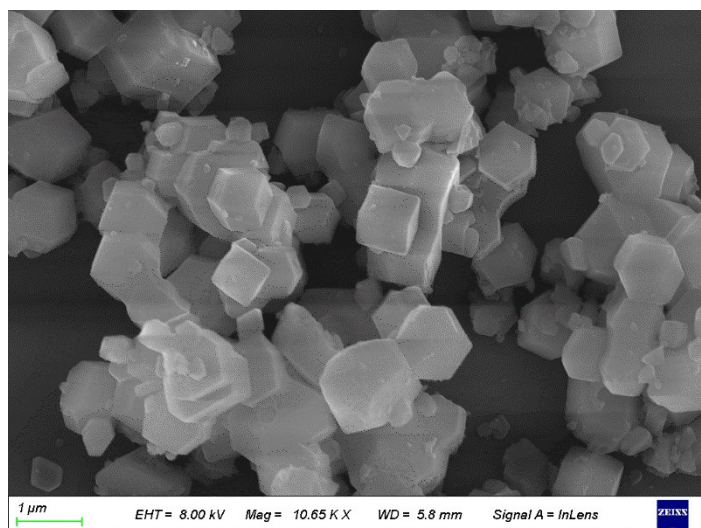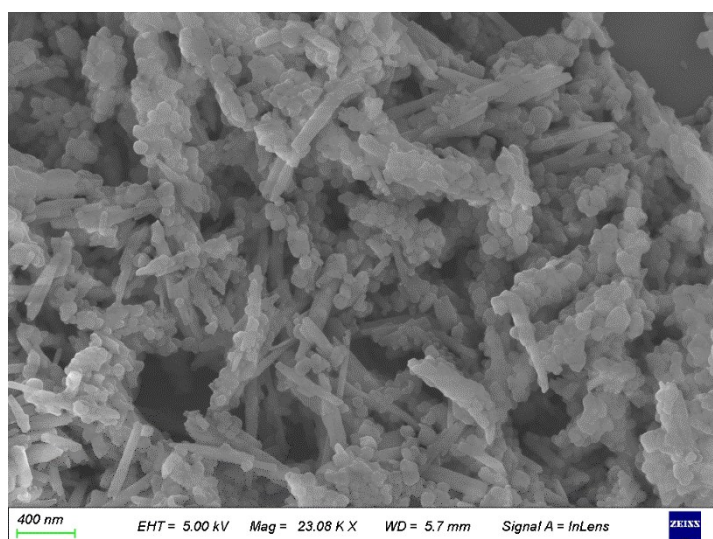

Figure S5. SEM of the used ZIF-67 (upper) and HNTs@ZIF-67 (below).

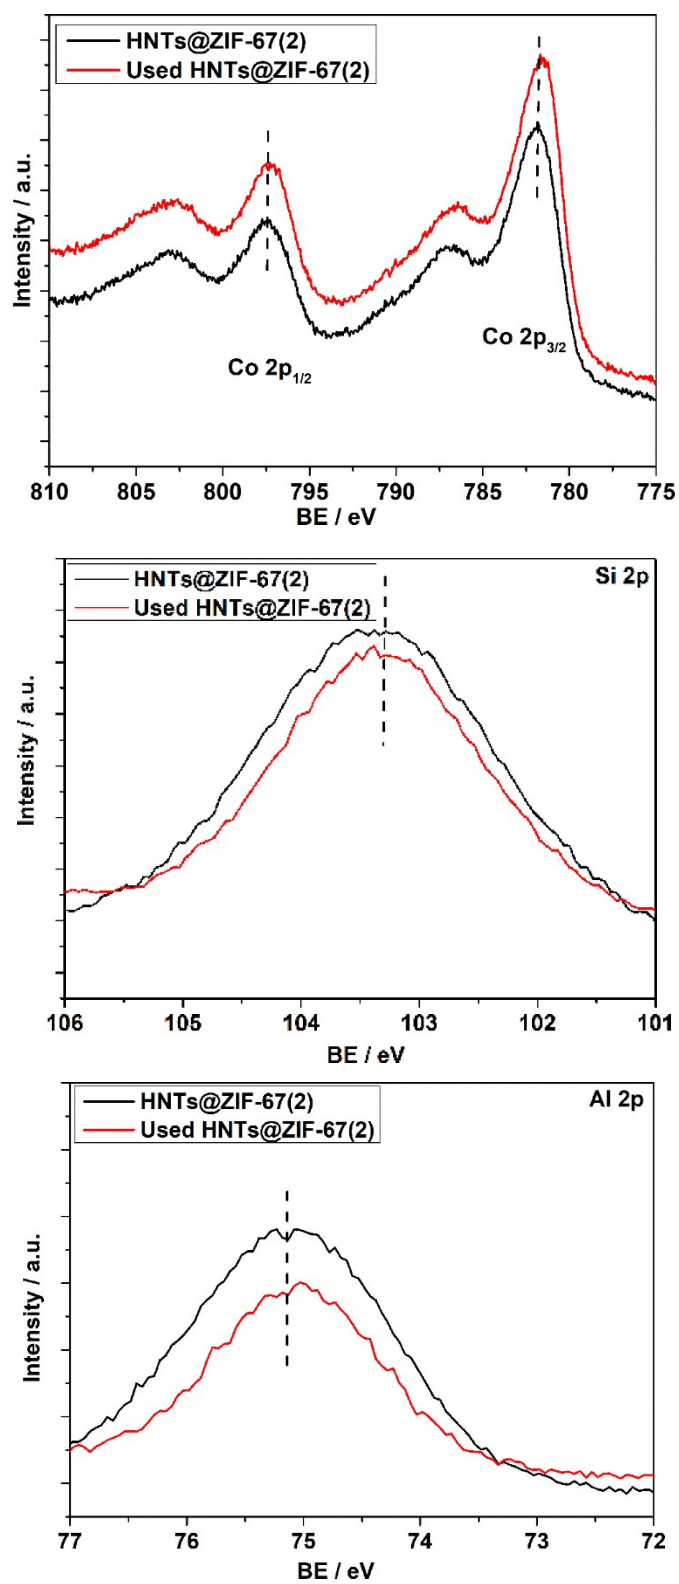

Figure S6. The XPS patterns of as-synthesized HNTs@ZIF-67 and used HNTs@ZIF-67.

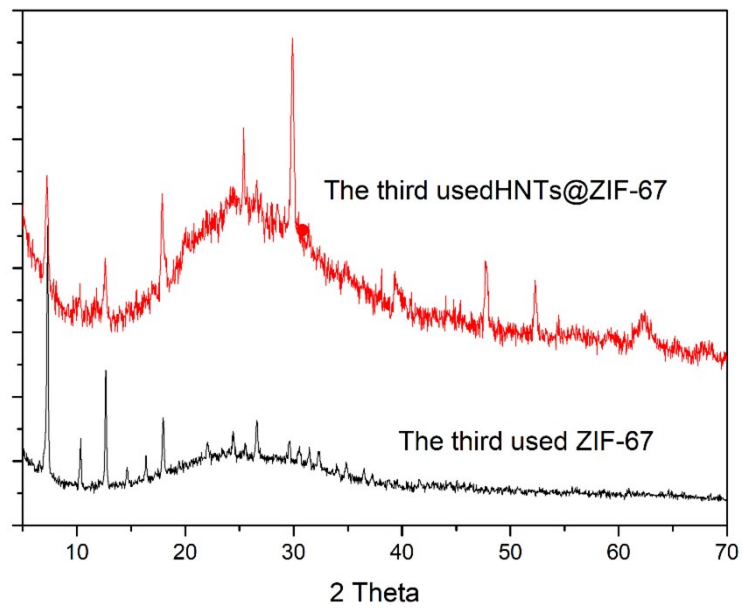

Figure S7. The PXRD patterns of the third used ZIF-67 and HNTs@ZIF-67.

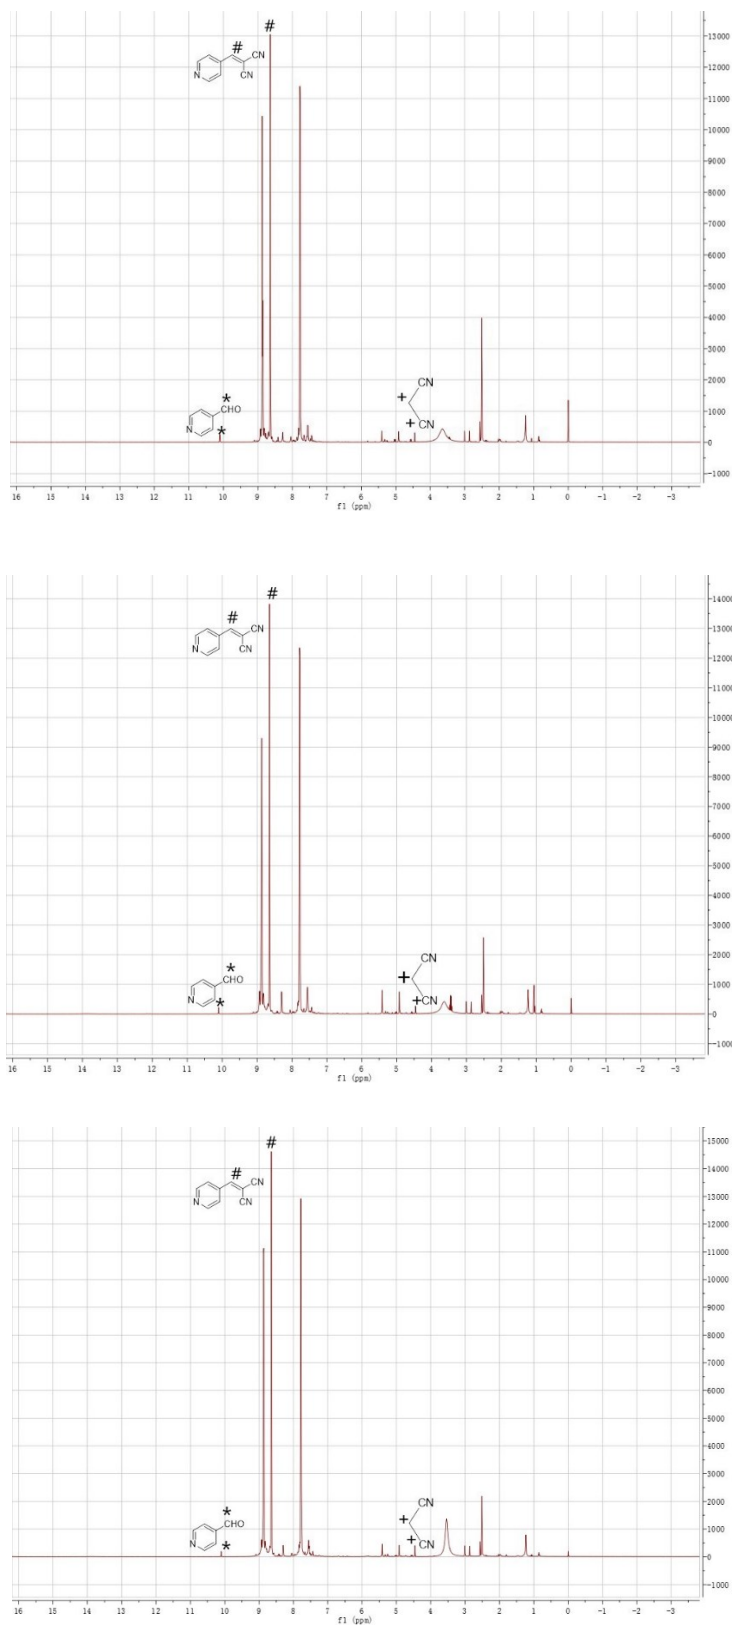

Figure S8. <sup>1</sup>H NMR spectra of the products from the Knoevenagel condensation reactions of 4-pyridinecarboxaldehyde with malononitrile in EtOH using the as-synthesized ZIF-67 as a catalyst: first run (upper), second run (middle) and third run (below).



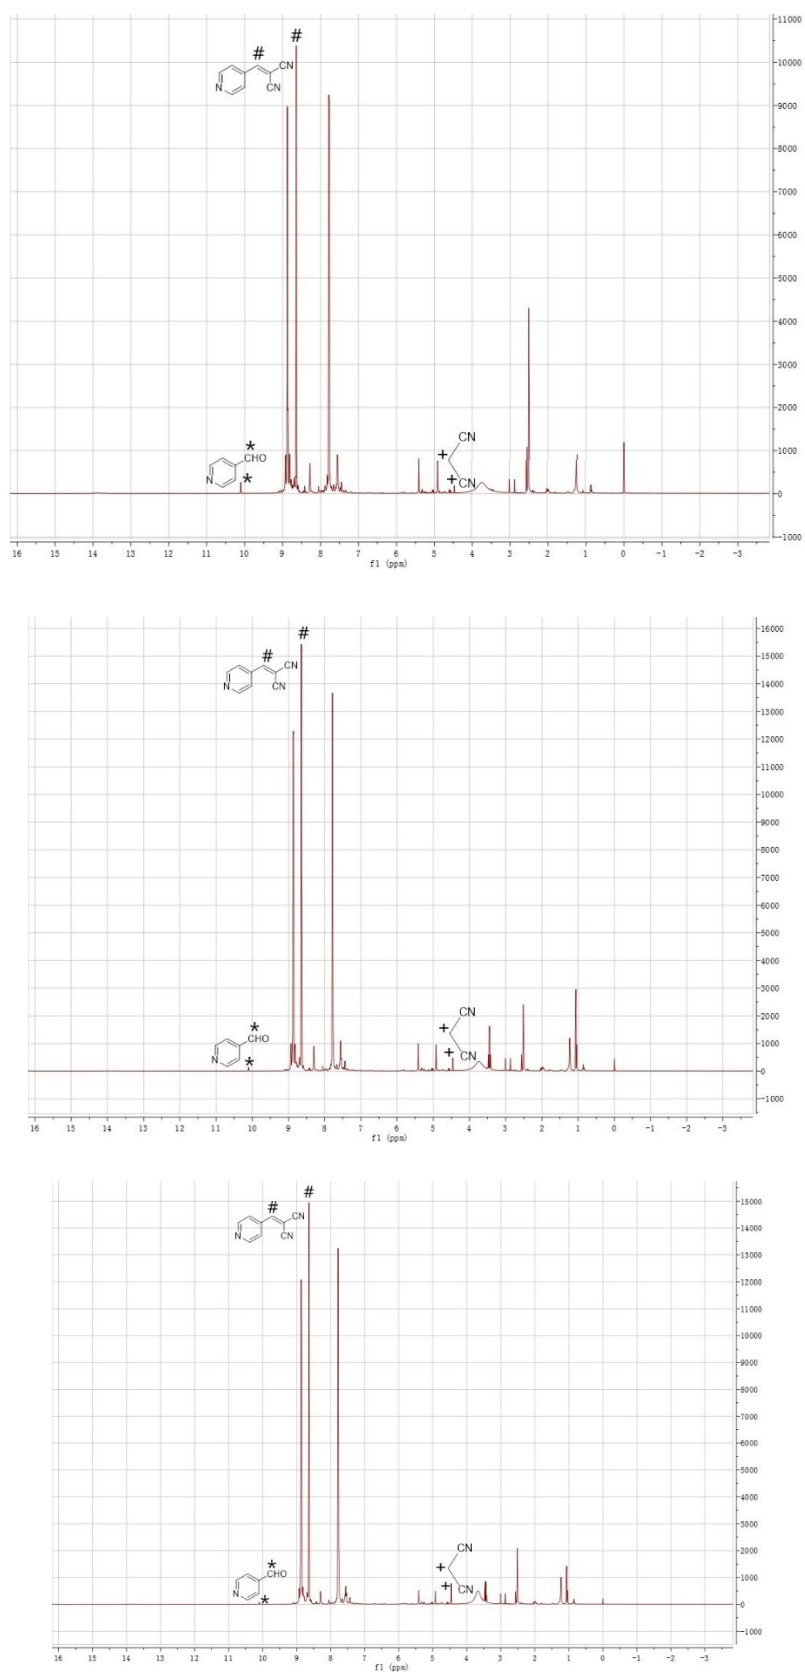

Figure S9. <sup>1</sup>H NMR spectra of the products from the Knoevenagel condensation reactions of 4-pyridinecarboxaldehyde with malononitrile in EtOH using the as-synthesized HNTs@ZIF-67 as a catalyst: first run (upper), second run (middle) and third run (below).

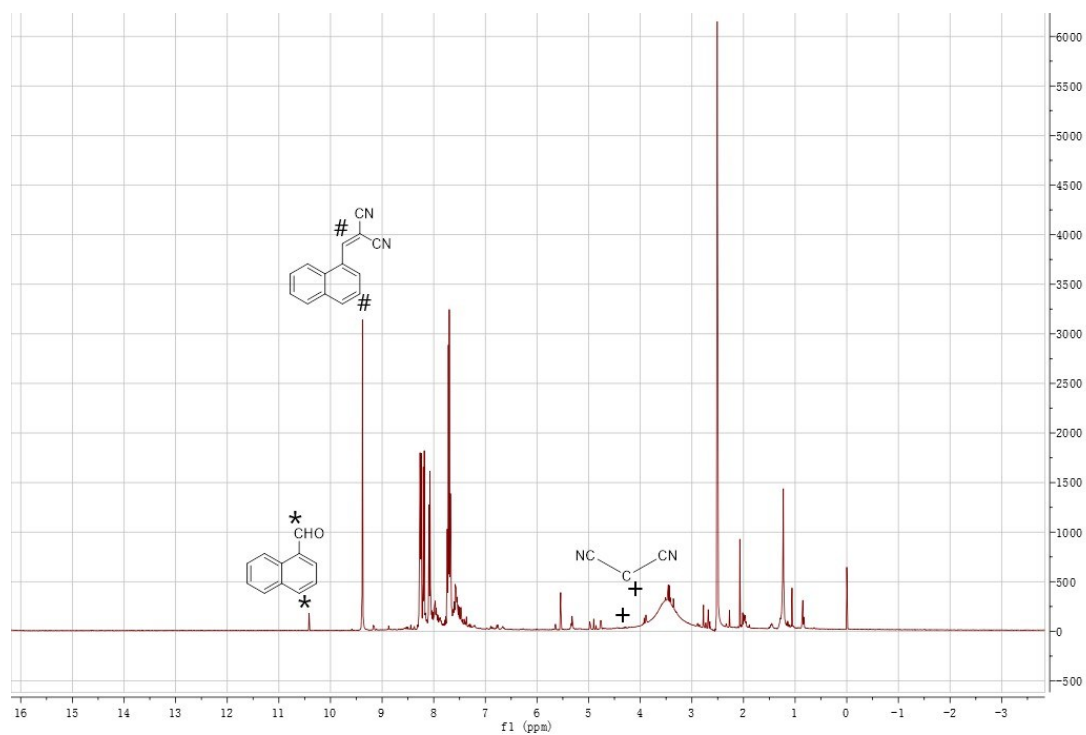

Figure S10.  $^1\text{H}$  NMR spectra of the product from the Knoevenagel condensation reaction of 1-naphthaldehyde with malononitrile in EtOH using the as-synthesized HNTs@ZIF-67 as a catalyst.

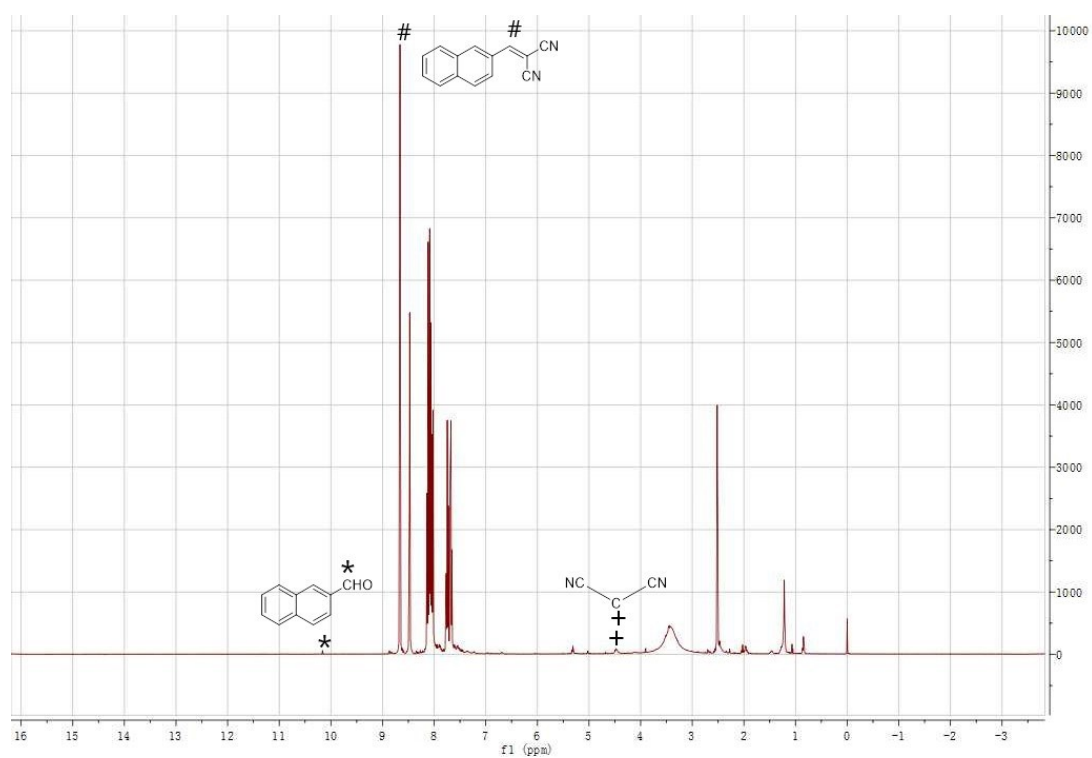

Figure S11. <sup>1</sup>H NMR spectra of the product from the Knoevenagel condensation reaction of 2-naphthaldehyde with malononitrile in EtOH using the as-synthesized HNTs@ZIF-67 as a catalyst.

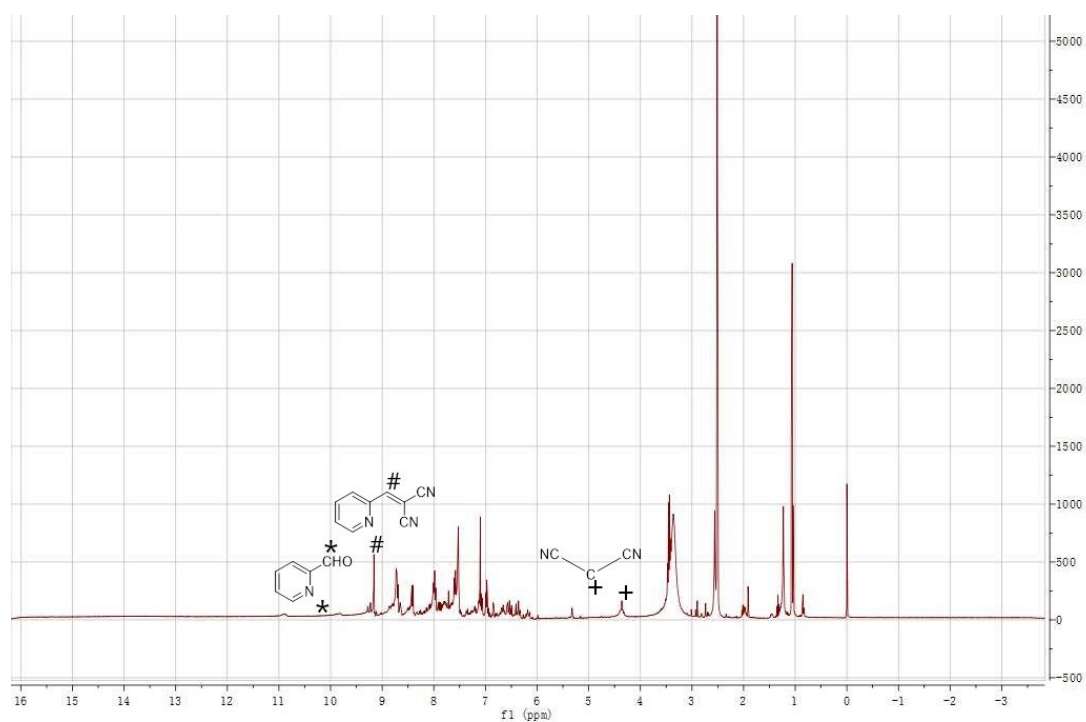

Figure S12. <sup>1</sup>H NMR spectra of the product from the Knoevenagel condensation reaction of 2-pyridinecarboxaldehyde with malononitrile in EtOH using the as-synthesized HNTs@ZIF-67 as a catalyst.

Table S1. The as-synthesized ZIF-67 catalyzed Knoevenagel condensation reaction of larger conjugated/heterocycle aromatic formaldehyde with malononitrile.

| Entry | Formaldehyde                                                                      | Product                                                                           | Solvent | Yield(%) |
|-------|-----------------------------------------------------------------------------------|-----------------------------------------------------------------------------------|---------|----------|
| 1     |  |  | EtOH    | 93       |
| 2     |  |  | Toluene | 80       |
| 3     |  |  | EtOH    | 97       |
| 4     |  |  | Toluene | 99       |
| 5     |  |  | EtOH    | 99       |
| 6     |  |  | Toluene | 99       |
| 7     |  |  | EtOH    | 98       |
| 8     |  |  | Toluene | 99       |

Reaction conditions: 0.5 mmol aromatic formaldehyde, 0.5 mmol malononitrile, 10 mg ZIF-67, 5 mL EtOH or Toluene, 5h and air atmosphere at room temperature.
